# Supplementary material for: Preparation, structural characterization and prebiotic potential of mulberry leaf oligosaccharides
Source: Royal Society of Chemistry journal article supplement (doi:10.1039/d1fo04048k), 2022-01-01
Supplement: d1fo04048k1.pdf [file d1fo04048k1.pdf]

**Table S1** Chemical composition of MLO 1-2

| Compound        | Content (mg per g dry weight) |
|-----------------|-------------------------------|
| Protein         | 0.62±0.05                     |
| Total sugar     | 995.17±3.31                   |
| Reducing sugar  | 75.31±0.25                    |
| Total phenol    | 0.02±0.01                     |
| Total flavonoid | 0.00±0.00                     |

**Table S2** The standard curves of monosaccharide.

| Monosaccharide | Equations               | R <sup>2</sup> |
|----------------|-------------------------|----------------|
| Man            | $y = 6109.9x - 251.91$  | 0.9984         |
| Rib            | $y = 3301.9x - 36.36$   | 0.9989         |
| Rha            | $y = 5313.0x - 530.55$  | 0.9918         |
| GlcA           | $y = 1315.0x - 109.31$  | 0.9962         |
| GalA           | $y = 2415.3x - 9.92$    | 0.9997         |
| Glc            | $y = 2597.3x - 1137.50$ | 0.9925         |
| Gal            | $y = 3772.2x - 161.07$  | 0.9975         |
| Xyl            | $y = 3148.1x - 250.70$  | 0.9921         |
| Ara            | $y = 4046.8x - 41.57$   | 0.9972         |
| Fuc            | $y = 3286.3x - 565.10$  | 0.9922         |

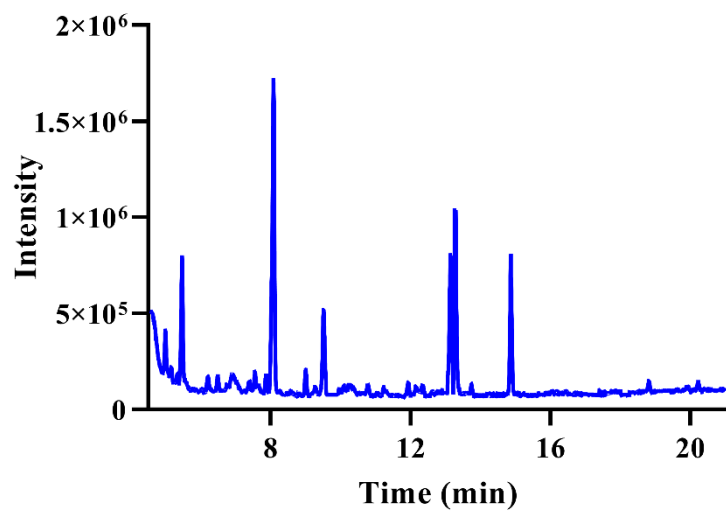

**Figure S1.** The total ion chromatogram of the PMAA of MLO 1-2

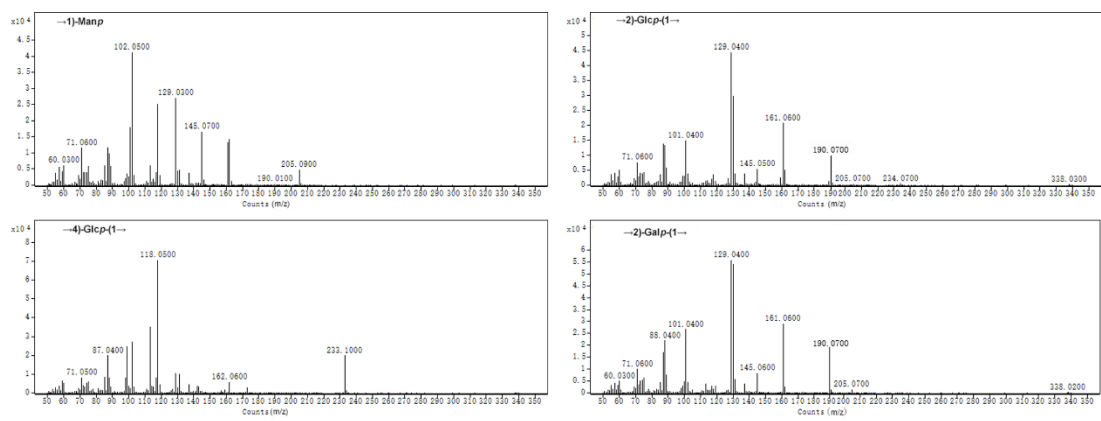

**Figure S2.** The EI-MS spectra of the PMAA of MLO 1-2
